# Supplementary material for: Synergistic effects of rare earth doping and carbon quantum dots on BiOF/Bi2MoO6 heterojunctions for enhanced visible-near-infrared photocatalysis
Source: Royal Society of Chemistry journal article supplement (doi:10.1039/d2cp05521j), 2023-01-01
Supplement: d2cp05521j1.pdf [file d2cp05521j1.pdf]

## **Supplementary Materials**

### **Synergistic effects of rare earth doping and carbon quantum dots on BiOF/Bi<sub>2</sub>MoO<sub>6</sub> heterojunction for enhanced visible-near- infrared photocatalysis**

Wen Liu<sup>a</sup>, Yan Cheng<sup>a</sup>, Jin Sui<sup>b</sup>, Junqi Ma<sup>a</sup>, Baijie Guan<sup>a</sup>, Kexin Wang<sup>a</sup>,  
Ziye Ren<sup>a</sup>, Tianya Tan<sup>a,\*</sup>, Jiwei Wang<sup>a,\*</sup>

<sup>a</sup> *College of Physics, Liaoning University, Shenyang 110036, China*

<sup>b</sup> *State Key Laboratory of Robotics, Shenyang Institute of Automation, Institutes for Robotics and Intelligent Manufacturing, Chinese Academy of Sciences*

\*E-mail: [wangjiwei@lnu.edu.cn](mailto:wangjiwei@lnu.edu.cn) (Jiwei Wang);

[fuwahetong@126.com](mailto:fuwahetong@126.com) (Tianya Tan);

## Texts

**Text S1.** Synthesis of CQDs and CQDs/BiOF:  $\text{Tm}^{3+}$ ,  $\text{Yb}^{3+}/\text{Bi}_2\text{MoO}_6$  composites

### (1) Synthesis of CQDs

6.912 g citric acid was added to the deionized water of 80 ml. After the citric acid was completely dissolved, the diethylenetriamine solution of 10.41 ml was added drop by drop to the solution and kept stirring for 30 min. After ultrasonic treatment for 30 min, the solution was placed in a 100 ml reactor and heated at 200 °C for 5 h. After cooling down to room temperature, the CQDs solution was obtained.

### (2) Synthesis of CQDs/BiOF: $\text{Tm}^{3+}$ , $\text{Yb}^{3+}/\text{Bi}_2\text{MoO}_6$ composites

0.97 g (2mmol) anhydrous bismuth nitrate and 0.242 g (1mmol) sodium molybdate dihydrate were dissolved in 20 ml glycol solution, heated and stirred until clarified. 0.305g x ml ( $x=2,4,6,8$ ) carbon quantum dots was added to sodium molybdate dihydrate solution, continue stirring for 30 min. Then, dropped sodium molybdate solution with carbon quantum dots into bismuth nitrate solution, stirring for a period of time. After adding 20ml anhydrous ethanol, the solution was poured into the reaction kettle, heated at 160 °C for 12 h, then cooling down. The precipitates were obtained by centrifugal washing and then dried at 80 °C for 24 h to achieve CQDs/BiOF:  $\text{Tm}^{3+}, \text{Yb}^{3+}/\text{Bi}_2\text{MoO}_6$  (CQDs/BFYT/B-2) composites with different carbon quantum dots ratios.

## Figures

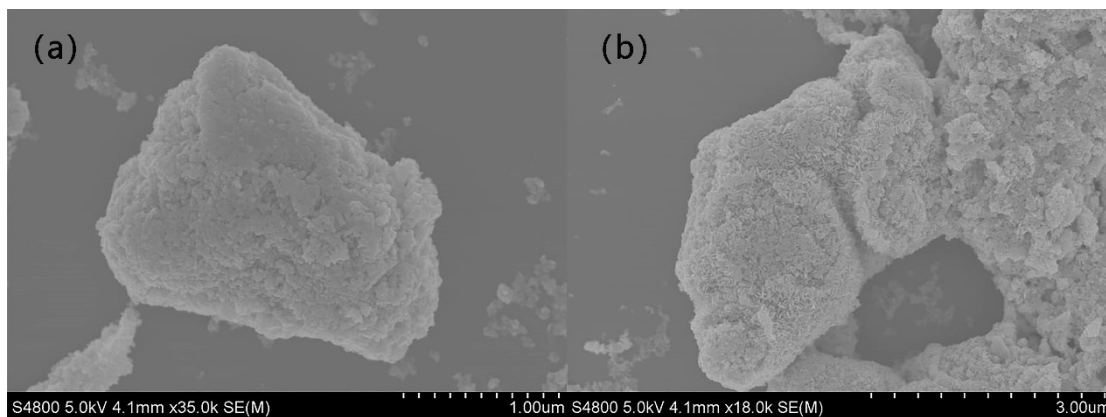

**Fig. S1** SEM images of (a) BFYT/B-2, (b) BFYT/B-3

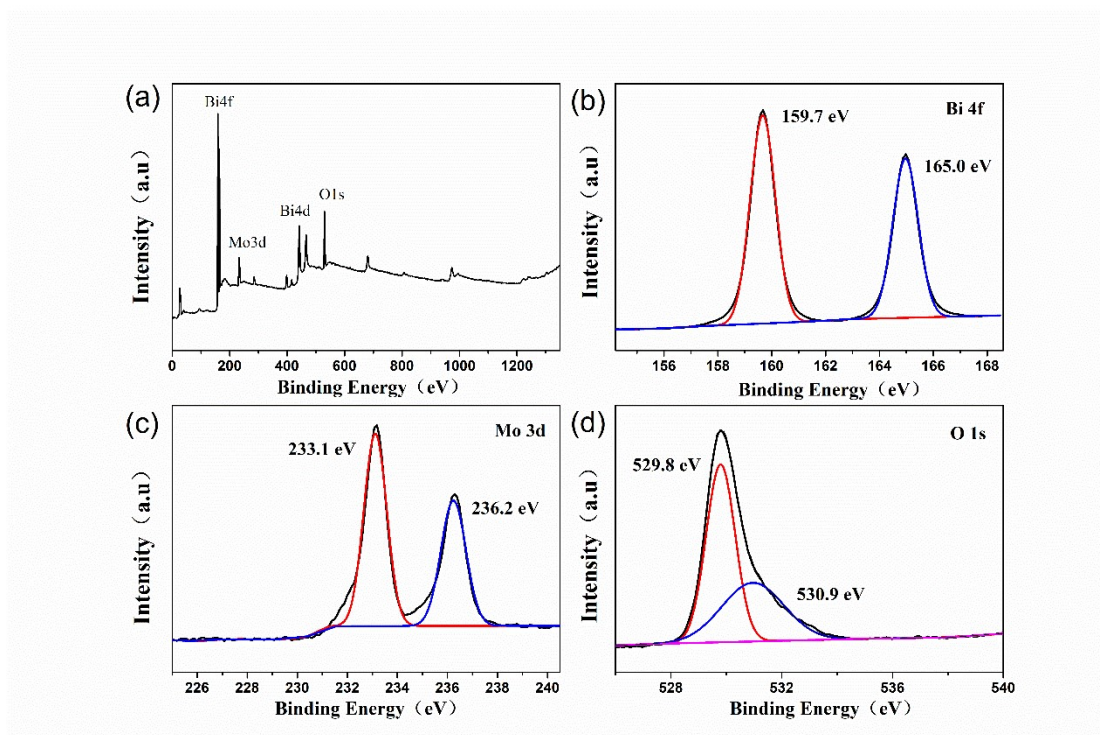

**Fig. S2** XPS survey spectrum (a) and high resolution XPS spectra of (b) Bi 4f, (c) Mo 3d, (d) O 1s of  $\text{Bi}_2\text{MoO}_6$ .

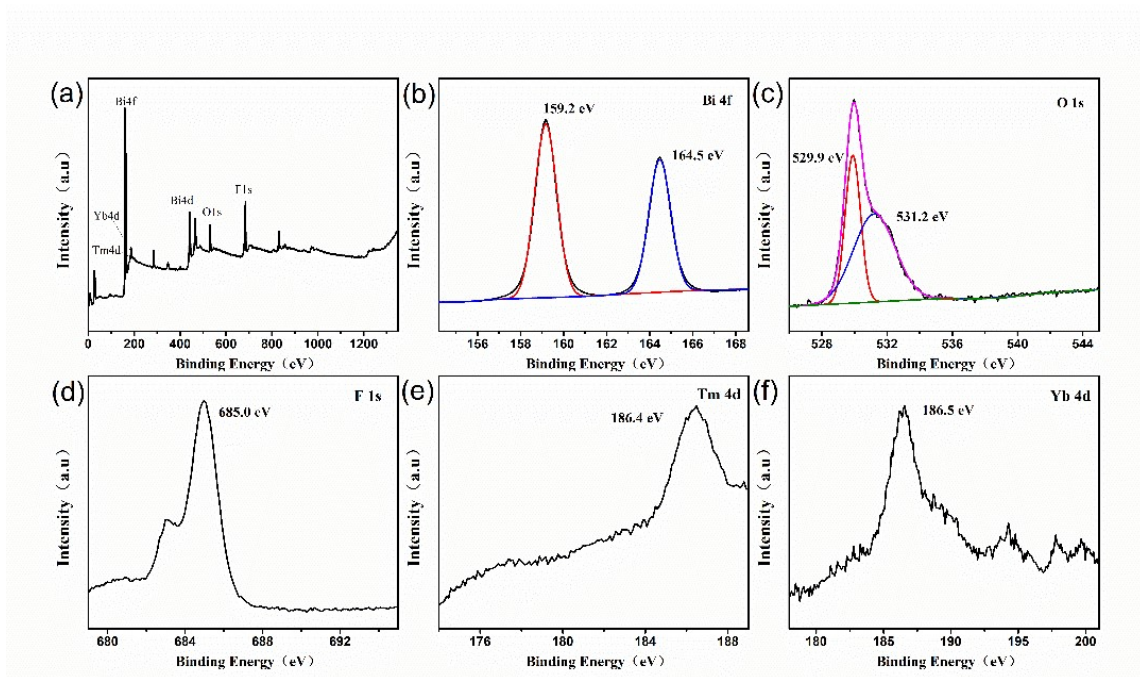

**Fig. S3** XPS survey spectrum (a) and high resolution XPS spectra of (b) Bi 4f, (c) O 1s, (d) F 1s, (e) Tm 4d and (f) Yb 4d of BiOF: Tm<sup>3+</sup>, Yb<sup>3+</sup>.

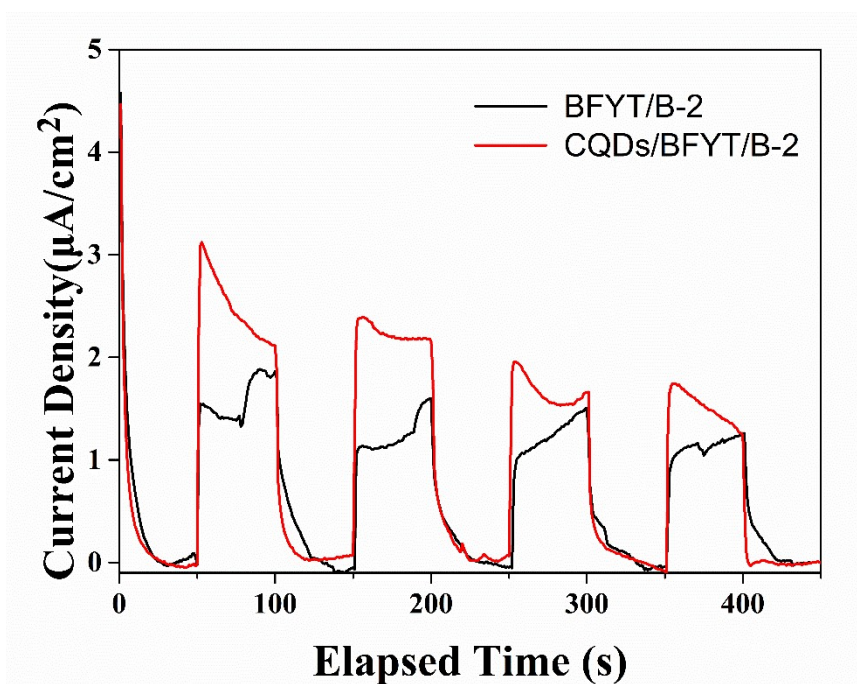

**Fig. S4** Transient photocurrent response of the CQDs/BFYT/B-2 sample

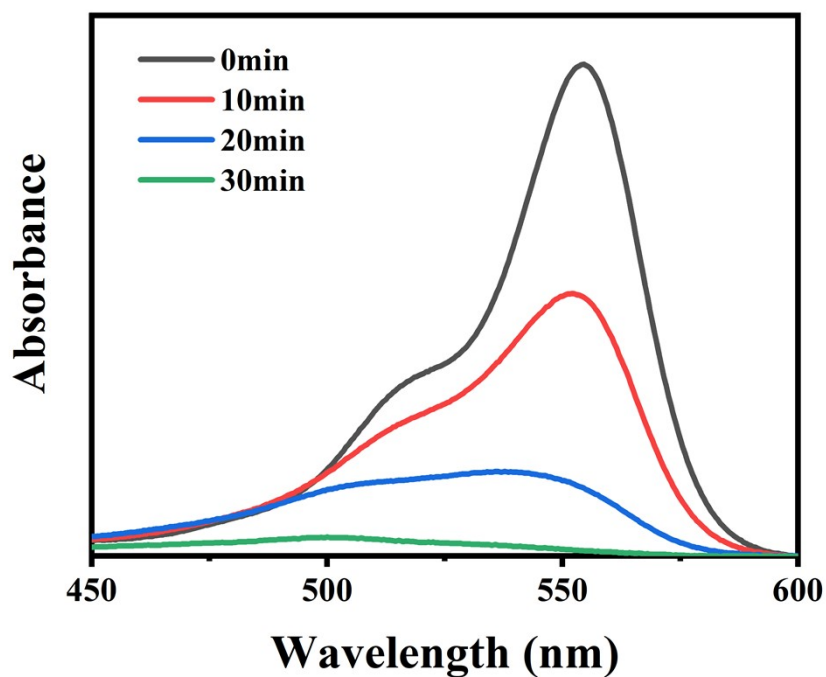

**Fig. S5** Absorbance spectra of RhB in BF/BYT sample

## Table

**Table S1.** Pseudo-first order rate constants for RhB degradation under NIR irradiation in different photocatalysts.

| <i>Sample</i>                                                         | <i>k (h<sup>-1</sup>)</i> | <i>R<sup>2</sup></i> |
|-----------------------------------------------------------------------|---------------------------|----------------------|
| CQDs/BFYT/B-2                                                         | 0.09763                   | 0.99692              |
| BFYT/B-2                                                              | 0.0911                    | 0.98885              |
| BFYT/BYT                                                              | 0.04087                   | 0.97632              |
| Bi <sub>2</sub> MoO <sub>6</sub> : Tm <sup>3+</sup> /Yb <sup>3+</sup> | 0.04253                   | 0.99302              |
| BF/BYT                                                                | 0.0115                    | 0.86787              |
| BFYT                                                                  | 0.00754                   | 0.98116              |
